# Supplementary material
Source: Springer Nature journal article supplement (https://www.springermedizin.de/resource/supplementary/12943_2010_613_MOESM15_ESM.pdf/9555110)

**Scrambled**

**pshAkt1**

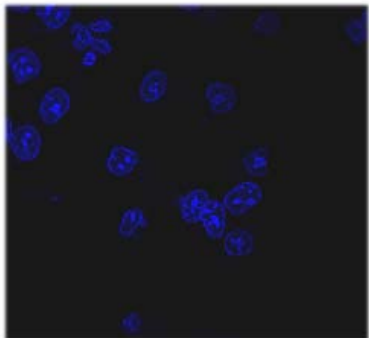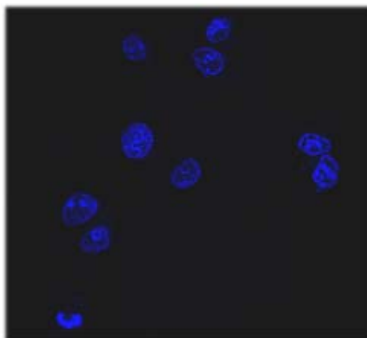

**DAPI**

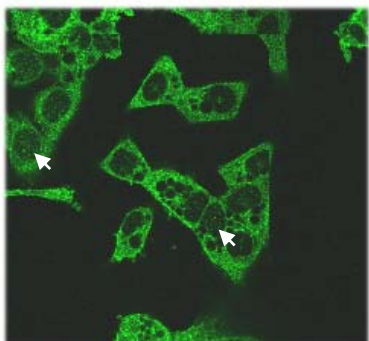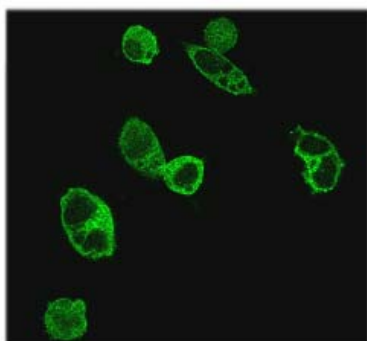

**p65**

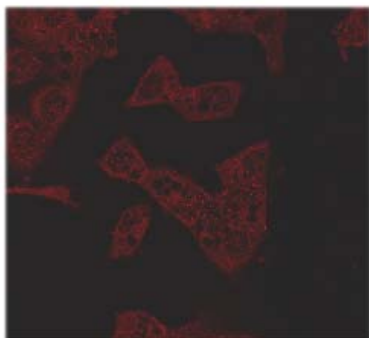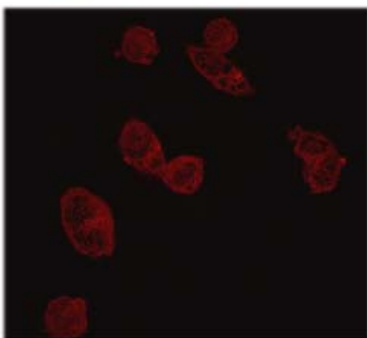

**Par-4**

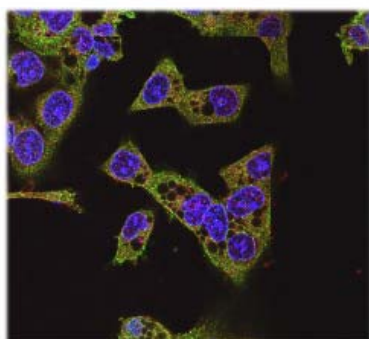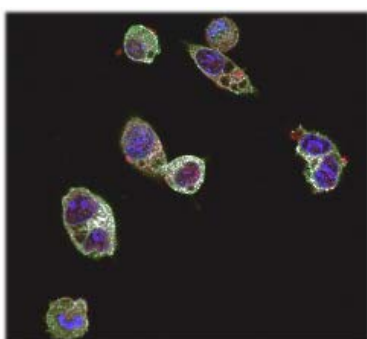

**merge**

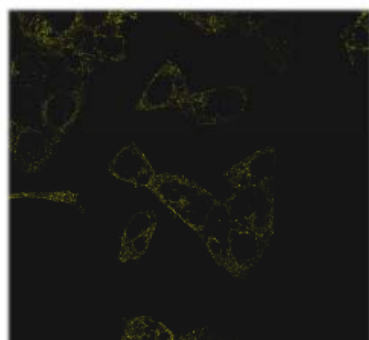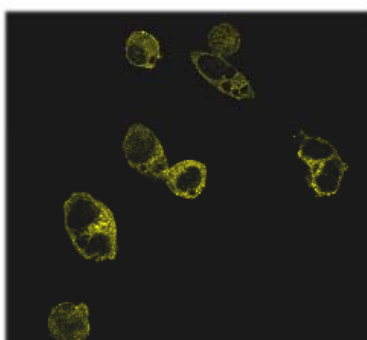

**Par-4/p65  
colocalize**

Supplement: MOESM15 [file 9555110]
